# Supplementary material for: MISS-Prot: web server for self/non-self discrimination of protein residue networks in parasites; theory and experiments in Fasciola peptides and Anisakis allergens
Source: Royal Society of Chemistry journal article supplement (doi:10.1039/c1mb05069a), 2011-04-06
Supplement: c1mb05069a_2.pdf [file c1mb05069a_2.pdf]

/\* ----- \*/  
/\*

Title: LNN, Neural Network execution code.  
Automatically generated by SNN, Tue Oct 13 19:04:10 2009

License Agreement:

-----

Copyright StatSoft Inc., 2000-2001, all rights reserved.  
This source code (Source Code Generated by STATISTICA Neural Networks, referred to as "CG" below) is owned by StatSoft Inc. and is protected by United States Copyright laws and international treaty provisions. You shall treat the CG like any copyrighted material.  
The CG may not be redistributed or used except in accordance with the conditions below.

The licensee is granted a license to incorporate the CG as embedded software in their own hardware and software products, and to distribute an unlimited number of such embedded copies as part of this license subject to obtaining prior written consent from StatSoft Inc., and subject to the conditions listed below.

Prior consent is required so that StatSoft Inc. can ensure that license conditions are not breached, and can track legitimate use of the CG. Consent shall not be refused unless StatSoft Inc. reasonably believes that a breach of license conditions will occur. Consent shall usually be granted within five working days of the request, providing that sufficient details of the intended use are given.

Requests should be sent to SNN Project Director, StatSoft, Inc.,  
2300 East 14th Street, Tulsa OK 74104 USA, FAX: 918-749-2217,  
E-Mail: info@statsoft.com.

The licensee may modify the CG as they see fit for embedded use, including recoding into alternative programming languages, altering the neural network architecture and weights, and otherwise modifying the CG, provided that they keep intact this copyright and license notice.

The licensee may distribute products including the compiled version of CG.

The licensee shall not:-

- Sublicense, rent, lease, or assign any portion of the CG to third parties.
- Allow compiled versions of the CG to be incorporated in products owned by third parties.
- Allow access to the CG to third parties.
- Use (implicitly or explicitly) any reference to StatSoft, Inc., STATISTICA,

STATISTICA Neural Networks, or any trade names used by StatSoft, Inc. to describe, promote, or reference products in which CG is used, or which benefit from CG.

Except as expressly stated herein, the CG is provided "AS IS." The licensee shall be entirely responsible for the selection of the CG and for the installation, integration, use of, and results obtained from, the CG. In particular, but without limitation, attention is drawn to the issue of "limited numeric accuracy," which implies that results may not be identical to those when executing the same network in STATISTICA Neural Networks or through its Application Programming Interface.

All other warranties or conditions, either express or implied, including but not limited to implied warranties of merchantability or fitness for a particular purpose, with respect to the CG and written information accompanying the CG, are excluded from the license.

No liability for Consequential Damages. To the maximum extent permitted by applicable law, in no event shall StatSoft Inc., or the vendor be liable for any damages whatsoever (including, without limitation, damages for loss of profits, business interruption, loss of information, or any other pecuniary loss) arising out of the use or inability to use this product, even if the vendor has been advised of the possibility of such damages.

This license and your right to use the CG shall terminate automatically if StatSoft, Inc. determines that you violate any part of the agreement or if you violate any part of this agreement without the knowledge of StatSoft, Inc. In the event of termination, you shall immediately destroy all copies of the CG.

This agreement constitutes the entire agreement between you and StatSoft Inc., and supersedes any prior agreement concerning the CG. It shall not be modified except by written agreement dated subsequent to the date of this agreement signed by an authorized representative of StatSoft Inc. StatSoft Inc. shall not be bound by any provision of any purchase order, confirmation, correspondence, or otherwise, unless StatSoft Inc. specifically agrees to the provision in writing.

This agreement shall be considered as a contract made in the United States of America and according to United States Law, subject to the exclusive jurisdiction of the United States Courts.

\*/

/\* standard includes. math.h needed for exp() function. \*/

#include <stdio.h>

```

#include <math.h>
#include <string.h>
#include <stdlib.h>

#ifndef FALSE
#define FALSE 0
#define TRUE 1
#endif

#define MENUCODE -999

static double LNN10Thresholds[] =
{

/* layer 1 */
988122608754.84961

};

static double LNN10Weights[] =
{

/* layer 1 */
1164052437210.9614, -346500758243.96606, -1168388519703.0415, -
20328175742039.75,
1230977599017.5466, 20592726259760.586, 8518253104937.4355, 29511139922940.746,
-8666136497804.9941, -21571446426455, -20755266968694.52, 22467947374345.574,
509148729360.35962, 31758740026970.699, -525640550997.6864, 27359205868888.996,
-26157596607672.91, -18915029472615.629, -32863361174494.145,
2290996953994.1509,
40254284369015.266, 7709218517397.2549, -20229131000693.039, -
1165548967898.9883,
9881382613614.4121, 9692350272659.3906, 3312610953957.6768, -
5508157462925.8398,
40073373962161.594, -30063598238118.73, -9328873804630.123, -34330104188400.258,
2584471446829.5557, -25556822051776.695, 19852808255348.23, 19652665915051.309,
5049565239531.0391, -8961808643065.6367, -10279397898093.129, -
19606764656779.871,
-18882943375109.695, 9061260682959.0625, 7279352143087.4609, -
45359893049357.148,
21148208649973.398, -19842288635159.266, 17625966674227.687,
22092814787008.211,
-31432074099285.465, -24462402558075.102, 33393057246326.582, -
14548687282098.322,
9432953040102.2988, 16299092500651.521, -5680521094985.7197,
3213803769940.8018,

```

```
9204107208950.0898, -2118213400254.3159, -51520770088614.844, -
7375167718439.8467,
26383346218925.5, 55318766293993.266, -26155441646471.867, -8483956504608.2168,
-37666038992544.383, 8692860529528.2305, 26347785414349.418, -
21907148632872.766,
-26165382170947.59, 10370056147391.766, -55786375523209.312, -
9997224391818.9004,
-6907058636510.4277, 51795375719216.883, 5906918853169.9121, 13242823436132.09,
-971762280895.29431, -12762664605047.533, 23850345783983.191,
18574726632885.215,
-23430741364141.168, 14623897929309.076, 4083624200017.9487, -14260502383778.6,
8155409857867.0439, 43241890297086.008, -7421625382572.0957,
4377250972834.5703,
23338698842285.066, -6362884133579.6445
```

```
};
```

```
static double LNN10Acts[182];
```

```
/* ----- */
/*
```

```
LNN10Run - run neural network LNN10
```

inputs - the input variables of this network.

The variable names are listed below, together with each variable's offset in the data set at the time code was generated (if the variable is then available).

Variable (Offset)

```
 $\mu$ 000
 $\mu$ 000avg
 $\mu$ 000dev
 $\mu$ 001
 $\mu$ 001avg
 $\mu$ 001dev
 $\mu$ 002
 $\mu$ 002avg
 $\mu$ 002dev
 $\mu$ 003
 $\mu$ 003avg
 $\mu$ 003dev
 $\mu$ 004
 $\mu$ 004avg
 $\mu$ 004dev
 $\mu$ 100
 $\mu$ 100avg
 $\mu$ 100dev
 $\mu$ 101
```

$\mu 101$ avg  
 $\mu 101$ dev  
 $\mu 102$   
 $\mu 102$ avg  
 $\mu 102$ dev  
 $\mu 103$   
 $\mu 103$ avg  
 $\mu 103$ dev  
 $\mu 104$   
 $\mu 104$ avg  
 $\mu 104$ dev  
 $\mu 200$   
 $\mu 200$ avg  
 $\mu 200$ dev  
 $\mu 201$   
 $\mu 201$ avg  
 $\mu 201$ dev  
 $\mu 202$   
 $\mu 202$ avg  
 $\mu 202$ dev  
 $\mu 203$   
 $\mu 203$ avg  
 $\mu 203$ dev  
 $\mu 204$   
 $\mu 204$ avg  
 $\mu 204$ dev  
 $\mu 300$   
 $\mu 300$ avg  
 $\mu 300$ dev  
 $\mu 301$   
 $\mu 301$ avg  
 $\mu 301$ dev  
 $\mu 302$   
 $\mu 302$ avg  
 $\mu 302$ dev  
 $\mu 303$   
 $\mu 303$ avg  
 $\mu 303$ dev  
 $\mu 304$   
 $\mu 304$ avg  
 $\mu 304$ dev  
 $\mu 400$   
 $\mu 400$ avg  
 $\mu 400$ dev  
 $\mu 401$   
 $\mu 401$ avg  
 $\mu 401$ dev

$\mu$ 4O2  
 $\mu$ 4O2avg  
 $\mu$ 4O2dev  
 $\mu$ 4O3  
 $\mu$ 4O3avg  
 $\mu$ 4O3dev  
 $\mu$ 4O4  
 $\mu$ 4O4avg  
 $\mu$ 4O4dev  
 $\mu$ 5O0  
 $\mu$ 5O0avg  
 $\mu$ 5O0dev  
 $\mu$ 5O1  
 $\mu$ 5O1avg  
 $\mu$ 5O1dev  
 $\mu$ 5O2  
 $\mu$ 5O2avg  
 $\mu$ 5O2dev  
 $\mu$ 5O3  
 $\mu$ 5O3avg  
 $\mu$ 5O3dev  
 $\mu$ 5O4  
 $\mu$ 5O4avg  
 $\mu$ 5O4dev

\*/

/\* ----- \*/

void LNN10Run( double inputs[], double outputs[], int outputType )

{

int i, j, k, u;

double \*w = LNN10Weights, \*t = LNN10Thresholds;

/\* Process inputs - apply pre-processing to each input in turn,

\* storing results in the neuron activations array.

\*/

/\* Input 0: standard numeric pre-processing: linear shift and scale. \*/

if ( inputs[0] == -9999 )

LNN10Acts[0] = 0.0024664534993155234;

else

LNN10Acts[0] = inputs[0] \* 0.00019897446715854938 + 0;

/\* Input 1: standard numeric pre-processing: linear shift and scale. \*/

if ( inputs[1] == -9999 )

LNN10Acts[1] = 0.42751501821871291;

else

```

LNN10Acts[1] = inputs[1] * 0.053441295546558708 + -0.026720647773279354;

/* Input 2: standard numeric pre-processing: linear shift and scale. */
if ( inputs[2] == -9999 )
    LNN10Acts[2] = 0.0045808935069142805;
else
    LNN10Acts[2] = inputs[2] * 0.00019823638663488865 + 0.0038085414886824057;

/* Input 3: standard numeric pre-processing: linear shift and scale. */
if ( inputs[3] == -9999 )
    LNN10Acts[3] = 0.012340613284334548;
else
    LNN10Acts[3] = inputs[3] * 0.00019897446715854938 + 0;

/* Input 4: standard numeric pre-processing: linear shift and scale. */
if ( inputs[4] == -9999 )
    LNN10Acts[4] = 0.65028748778227441;
else
    LNN10Acts[4] = inputs[4] * 0.015289164635497451 + -0.08918679370706846;

/* Input 5: standard numeric pre-processing: linear shift and scale. */
if ( inputs[5] == -9999 )
    LNN10Acts[5] = 0.016674794000276744;
else
    LNN10Acts[5] = inputs[5] * 0.0001964182634520473 + 0.013992666289833892;

/* Input 6: standard numeric pre-processing: linear shift and scale. */
if ( inputs[6] == -9999 )
    LNN10Acts[6] = 0.020037236738136597;
else
    LNN10Acts[6] = inputs[6] * 0.00019897446715854938 + 0;

/* Input 7: standard numeric pre-processing: linear shift and scale. */
if ( inputs[7] == -9999 )
    LNN10Acts[7] = 0.58270523982064493;
else
    LNN10Acts[7] = inputs[7] * 0.011461318051575931 + -0.25214899713467048;

/* Input 8: standard numeric pre-processing: linear shift and scale. */
if ( inputs[8] == -9999 )
    LNN10Acts[8] = 0.026816149353272822;
else
    LNN10Acts[8] = inputs[8] * 0.00019557911163745775 + 0.021367017946392258;

/* Input 9: standard numeric pre-processing: linear shift and scale. */
if ( inputs[9] == -9999 )
    LNN10Acts[9] = 0.033851063318347689;

```

```

else
  LNN10Acts[9] = inputs[9] * 0.00019897446715854938 + 0;

/* Input 10: standard numeric pre-processing: linear shift and scale. */
if ( inputs[10] == -9999 )
  LNN10Acts[10] = 0.40841307754993122;
else
  LNN10Acts[10] = inputs[10] * 0.0047876769358867607 + -0.27529142381348876;

/* Input 11: standard numeric pre-processing: linear shift and scale. */
if ( inputs[11] == -9999 )
  LNN10Acts[11] = 0.056105515538165458;
else
  LNN10Acts[11] = inputs[11] * 0.00019103510356941806 + 0.050885937479045205;

/* Input 12: standard numeric pre-processing: linear shift and scale. */
if ( inputs[12] == -9999 )
  LNN10Acts[12] = 0.041465767538834131;
else
  LNN10Acts[12] = inputs[12] * 0.00012242899118511264 + 0;

/* Input 13: standard numeric pre-processing: linear shift and scale. */
if ( inputs[13] == -9999 )
  LNN10Acts[13] = 0.56167130824852096;
else
  LNN10Acts[13] = inputs[13] * 0.0030087646622770675 + -0.25825230017878165;

/* Input 14: standard numeric pre-processing: linear shift and scale. */
if ( inputs[14] == -9999 )
  LNN10Acts[14] = 0.057440758276209203;
else
  LNN10Acts[14] = inputs[14] * 0.00011858704639073695 + 0.04959258720475232;

/* Input 15: standard numeric pre-processing: linear shift and scale. */
if ( inputs[15] == -9999 )
  LNN10Acts[15] = 0.99952189744719722;
else
  LNN10Acts[15] = inputs[15] * 6.7762613285860989e-011 + 0.99999965944065961;

/* Input 16: standard numeric pre-processing: linear shift and scale. */
if ( inputs[16] == -9999 )
  LNN10Acts[16] = 0.44251671863202452;
else
  LNN10Acts[16] = inputs[16] * 1.3458511080840785 + -0.020681245360892008;

/* Input 17: standard numeric pre-processing: linear shift and scale. */
if ( inputs[17] == -9999 )

```



```

LNN10Acts[17] = 0.99952189742494102;
else
LNN10Acts[17] = inputs[17] * 6.7762613282449192e-011 + 0.99999965944170099;

/* Input 18: standard numeric pre-processing: linear shift and scale. */
if ( inputs[18] == -9999 )
LNN10Acts[18] = 0.99951688527456706;
else
LNN10Acts[18] = inputs[18] * 7.7442983150293666e-011 + 0.99999961078934263;

/* Input 19: standard numeric pre-processing: linear shift and scale. */
if ( inputs[19] == -9999 )
LNN10Acts[19] = 0.64552042702139178;
else
LNN10Acts[19] = inputs[19] * 0.30389888455295788 + -0.06761243683162392;

/* Input 20: standard numeric pre-processing: linear shift and scale. */
if ( inputs[20] == -9999 )
LNN10Acts[20] = 0.99951688511019143;
else
LNN10Acts[20] = inputs[20] * 7.7442983130558765e-011 + 0.99999961080657263;

/* Input 21: standard numeric pre-processing: linear shift and scale. */
if ( inputs[21] == -9999 )
LNN10Acts[21] = 0.99950078318963775;
else
LNN10Acts[21] = inputs[21] * 8.7435621949295615e-011 + 0.99999956056863371;

/* Input 22: standard numeric pre-processing: linear shift and scale. */
if ( inputs[22] == -9999 )
LNN10Acts[22] = 0.58365978067067326;
else
LNN10Acts[22] = inputs[22] * 0.1914584927838045 + -0.19169143395002478;

/* Input 23: standard numeric pre-processing: linear shift and scale. */
if ( inputs[23] == -9999 )
LNN10Acts[23] = 0.9995007829233189;
else
LNN10Acts[23] = inputs[23] * 8.7435621909365358e-011 + 0.9999995606561759;

/* Input 24: standard numeric pre-processing: linear shift and scale. */
if ( inputs[24] == -9999 )
LNN10Acts[24] = 0.99956719062957922;
else
LNN10Acts[24] = inputs[24] * 4.3368078003008944e-011 + 0.99999978204199458;

/* Input 25: standard numeric pre-processing: linear shift and scale. */

```

```

if ( inputs[25] == -9999 )
  LNN10Acts[25] = 0.38738613907960079;
else
  LNN10Acts[25] = inputs[25] * 0.086546236950802977 + -0.37140884856252349;

/* Input 26: standard numeric pre-processing: linear shift and scale. */
if ( inputs[26] == -9999 )
  LNN10Acts[26] = 0.99956719043554709;
else
  LNN10Acts[26] = inputs[26] * 4.336807799439778e-011 + 0.99999978222810659;

/* Input 27: standard numeric pre-processing: linear shift and scale. */
if ( inputs[27] == -9999 )
  LNN10Acts[27] = 0.99953401427685873;
else
  LNN10Acts[27] = inputs[27] * 1.6086084539955739e-011 + 0.9999999191550315;

/* Input 28: standard numeric pre-processing: linear shift and scale. */
if ( inputs[28] == -9999 )
  LNN10Acts[28] = 0.58265864185011185;
else
  LNN10Acts[28] = inputs[28] * 0.058300263424248239 + -0.32243057853886198;

/* Input 29: standard numeric pre-processing: linear shift and scale. */
if ( inputs[29] == -9999 )
  LNN10Acts[29] = 0.99953401411618958;
else
  LNN10Acts[29] = inputs[29] * 1.6086084536617535e-011 + 0.99999991924399589;

/* Input 30: standard numeric pre-processing: linear shift and scale. */
if ( inputs[30] == -9999 )
  LNN10Acts[30] = 0.99952206756291384;
else
  LNN10Acts[30] = inputs[30] * 3.3881312357767097e-011 + 0.9999998297203011;

/* Input 31: standard numeric pre-processing: linear shift and scale. */
if ( inputs[31] == -9999 )
  LNN10Acts[31] = 0.43129811422089592;
else
  LNN10Acts[31] = inputs[31] * 0.90809650589230806 + -0.022021340267888476;

/* Input 32: standard numeric pre-processing: linear shift and scale. */
if ( inputs[32] == -9999 )
  LNN10Acts[32] = 0.99952206754683981;
else
  LNN10Acts[32] = inputs[32] * 3.3881312356502977e-011 + 0.99999982972112278;

```

```

/* Input 33: standard numeric pre-processing: linear shift and scale. */
if ( inputs[33] == -9999 )
  LNN10Acts[33] = 0.99951707964030245;
else
  LNN10Acts[33] = inputs[33] * 3.8721499013045177e-011 + 0.99999980539463407;

/* Input 34: standard numeric pre-processing: linear shift and scale. */
if ( inputs[34] == -9999 )
  LNN10Acts[34] = 0.61706899825374562;
else
  LNN10Acts[34] = inputs[34] * 0.20149841548973266 + -0.06646761065621315;

/* Input 35: standard numeric pre-processing: linear shift and scale. */
if ( inputs[35] == -9999 )
  LNN10Acts[35] = 0.99951707952181423;
else
  LNN10Acts[35] = inputs[35] * 3.8721499005604151e-011 + 0.99999980540740685;

/* Input 36: standard numeric pre-processing: linear shift and scale. */
if ( inputs[36] == -9999 )
  LNN10Acts[36] = 0.99950100257106156;
else
  LNN10Acts[36] = inputs[36] * 4.3717820433157167e-011 + 0.99999978028426939;

/* Input 37: standard numeric pre-processing: linear shift and scale. */
if ( inputs[37] == -9999 )
  LNN10Acts[37] = 0.57521705815925384;
else
  LNN10Acts[37] = inputs[37] * 0.13331287141762951 + -0.20641720634067695;

/* Input 38: standard numeric pre-processing: linear shift and scale. */
if ( inputs[38] == -9999 )
  LNN10Acts[38] = 0.99950100238259199;
else
  LNN10Acts[38] = inputs[38] * 4.3717820418820608e-011 + 0.99999978035196069;

/* Input 39: standard numeric pre-processing: linear shift and scale. */
if ( inputs[39] == -9999 )
  LNN10Acts[39] = 0.9995672993860123;
else
  LNN10Acts[39] = inputs[39] * 2.1684041306884304e-011 + 0.99999989102098574;

/* Input 40: standard numeric pre-processing: linear shift and scale. */
if ( inputs[40] == -9999 )
  LNN10Acts[40] = 0.3913143490349294;
else
  LNN10Acts[40] = inputs[40] * 0.057878142017694319 + -0.33832571452873189;

```

```

/* Input 41: standard numeric pre-processing: linear shift and scale. */
if ( inputs[41] == -9999 )
  LNN10Acts[41] = 0.99956729923947063;
else
  LNN10Acts[41] = inputs[41] * 2.1684041303662717e-011 + 0.99999989114773935;

/* Input 42: standard numeric pre-processing: linear shift and scale. */
if ( inputs[42] == -9999 )
  LNN10Acts[42] = 0.99953405457698974;
else
  LNN10Acts[42] = inputs[42] * 8.0430425749044379e-012 + 0.9999999595775142;

/* Input 43: standard numeric pre-processing: linear shift and scale. */
if ( inputs[43] == -9999 )
  LNN10Acts[43] = 0.57797510637666183;
else
  LNN10Acts[43] = inputs[43] * 0.039488011039245582 + -0.30595179326504013;

/* Input 44: standard numeric pre-processing: linear shift and scale. */
if ( inputs[44] == -9999 )
  LNN10Acts[44] = 0.99953405445933674;
else
  LNN10Acts[44] = inputs[44] * 8.0430425736820685e-012 + 0.99999995963983146;

/* Input 45: standard numeric pre-processing: linear shift and scale. */
if ( inputs[45] == -9999 )
  LNN10Acts[45] = 0.99952212426790088;
else
  LNN10Acts[45] = inputs[45] * 2.2587542857390072e-011 + 0.99999988648019433;

/* Input 46: standard numeric pre-processing: linear shift and scale. */
if ( inputs[46] == -9999 )
  LNN10Acts[46] = 0.43463142253924975;
else
  LNN10Acts[46] = inputs[46] * 0.72305470894856894 + -0.022920834273669637;

/* Input 47: standard numeric pre-processing: linear shift and scale. */
if ( inputs[47] == -9999 )
  LNN10Acts[47] = 0.99952212425433828;
else
  LNN10Acts[47] = inputs[47] * 2.2587542856684461e-011 + 0.99999988648091032;

/* Input 48: standard numeric pre-processing: linear shift and scale. */
if ( inputs[48] == -9999 )
  LNN10Acts[48] = 0.99951714442671258;
else

```

```

LNN10Acts[48] = inputs[48] * 2.5814334346177584e-011 + 0.9999998702630809;

/* Input 49: standard numeric pre-processing: linear shift and scale. */
if ( inputs[49] == -9999 )
    LNN10Acts[49] = 0.62682506525409387;
else
    LNN10Acts[49] = inputs[49] * 0.15778496682212623 + -0.066369616544280363;

/* Input 50: standard numeric pre-processing: linear shift and scale. */
if ( inputs[50] == -9999 )
    LNN10Acts[50] = 0.99951714432424021;
else
    LNN10Acts[50] = inputs[50] * 2.5814334341954242e-011 + 0.99999987027393933;

/* Input 51: standard numeric pre-processing: linear shift and scale. */
if ( inputs[51] == -9999 )
    LNN10Acts[51] = 0.99950107569537128;
else
    LNN10Acts[51] = inputs[51] * 2.914521575544428e-011 + 0.99999985352283549;

/* Input 52: standard numeric pre-processing: linear shift and scale. */
if ( inputs[52] == -9999 )
    LNN10Acts[52] = 0.57905613424841007;
else
    LNN10Acts[52] = inputs[52] * 0.10147438009411504 + -0.20390431060078298;

/* Input 53: standard numeric pre-processing: linear shift and scale. */
if ( inputs[53] == -9999 )
    LNN10Acts[53] = 0.99950107552919953;
else
    LNN10Acts[53] = inputs[53] * 2.9145215747073264e-011 + 0.99999985358140042;

/* Input 54: standard numeric pre-processing: linear shift and scale. */
if ( inputs[54] == -9999 )
    LNN10Acts[54] = 0.99956733563566291;
else
    LNN10Acts[54] = inputs[54] * 1.4456028061333241e-011 + 0.99999992734732113;

/* Input 55: standard numeric pre-processing: linear shift and scale. */
if ( inputs[55] == -9999 )
    LNN10Acts[55] = 0.38491857220633779;
else
    LNN10Acts[55] = inputs[55] * 0.046152967858237262 + -0.37586823180522227;

/* Input 56: standard numeric pre-processing: linear shift and scale. */
if ( inputs[56] == -9999 )
    LNN10Acts[56] = 0.99956733551515131;

```

```

else
  LNN10Acts[56] = inputs[56] * 1.4456028059581109e-011 + 0.99999992746505062;

/* Input 57: standard numeric pre-processing: linear shift and scale. */
if ( inputs[57] == -9999 )
  LNN10Acts[57] = 0.99953406835490155;
else
  LNN10Acts[57] = inputs[57] * 5.3620284552755886e-012 + 0.99999997305167565;

/* Input 58: standard numeric pre-processing: linear shift and scale. */
if ( inputs[58] == -9999 )
  LNN10Acts[58] = 0.58407397011961093;
else
  LNN10Acts[58] = inputs[58] * 0.031314655971516628 + -0.33211436874804678;

/* Input 59: standard numeric pre-processing: linear shift and scale. */
if ( inputs[59] == -9999 )
  LNN10Acts[59] = 0.99953406825495106;
else
  LNN10Acts[59] = inputs[59] * 5.3620284545765547e-012 + 0.99999997310854394;

/* Input 60: standard numeric pre-processing: linear shift and scale. */
if ( inputs[60] == -9999 )
  LNN10Acts[60] = 0.99952215261936928;
else
  LNN10Acts[60] = inputs[60] * 1.694065761600335e-011 + 0.99999991486014339;

/* Input 61: standard numeric pre-processing: linear shift and scale. */
if ( inputs[61] == -9999 )
  LNN10Acts[61] = 0.43087811362400869;
else
  LNN10Acts[61] = inputs[61] * 0.62424393182877935 + -0.02387733039245081;

/* Input 62: standard numeric pre-processing: linear shift and scale. */
if ( inputs[62] == -9999 )
  LNN10Acts[62] = 0.99952215260768906;
else
  LNN10Acts[62] = inputs[62] * 1.6940657615543616e-011 + 0.99999991486079132;

/* Input 63: standard numeric pre-processing: linear shift and scale. */
if ( inputs[63] == -9999 )
  LNN10Acts[63] = 0.99951717681240526;
else
  LNN10Acts[63] = inputs[63] * 1.9360751374836183e-011 + 0.99999990269730765;

/* Input 64: standard numeric pre-processing: linear shift and scale. */
if ( inputs[64] == -9999 )

```

```

LNN10Acts[64] = 0.6146835801114251;
else
LNN10Acts[64] = inputs[64] * 0.13451574027782504 + -0.066861048705092935;

/* Input 65: standard numeric pre-processing: linear shift and scale. */
if ( inputs[65] == -9999 )
LNN10Acts[65] = 0.99951717672400375;
else
LNN10Acts[65] = inputs[65] * 1.9360751372049605e-011 + 0.99999990270693084;

/* Input 66: standard numeric pre-processing: linear shift and scale. */
if ( inputs[66] == -9999 )
LNN10Acts[66] = 0.99950111224034521;
else
LNN10Acts[66] = inputs[66] * 2.1858912597142106e-011 + 0.99999989014212276;

/* Input 67: standard numeric pre-processing: linear shift and scale. */
if ( inputs[67] == -9999 )
LNN10Acts[67] = 0.57556805189029414;
else
LNN10Acts[67] = inputs[67] * 0.088391738452074181 + -0.21127687963942945;

/* Input 68: standard numeric pre-processing: linear shift and scale. */
if ( inputs[68] == -9999 )
LNN10Acts[68] = 0.99950111209813286;
else
LNN10Acts[68] = inputs[68] * 2.1858912591736487e-011 + 0.99999989019437052;

/* Input 69: standard numeric pre-processing: linear shift and scale. */
if ( inputs[69] == -9999 )
LNN10Acts[69] = 0.99956735374429184;
else
LNN10Acts[69] = inputs[69] * 1.0842021235184758e-011 + 0.99999994551048987;

/* Input 70: standard numeric pre-processing: linear shift and scale. */
if ( inputs[70] == -9999 )
LNN10Acts[70] = 0.38873412751868813;
else
LNN10Acts[70] = inputs[70] * 0.039534966801657696 + -0.36143986807468181;

/* Input 71: standard numeric pre-processing: linear shift and scale. */
if ( inputs[71] == -9999 )
LNN10Acts[71] = 0.99956735363773208;
else
LNN10Acts[71] = inputs[71] * 1.0842021234028306e-011 + 0.99999994560961081;

/* Input 72: standard numeric pre-processing: linear shift and scale. */

```

```

if ( inputs[72] == -9999 )
  LNN10Acts[72] = 0.99953407505966541;
else
  LNN10Acts[72] = inputs[72] * 4.0215213658211277e-012 + 0.99999997978875665;

/* Input 73: standard numeric pre-processing: linear shift and scale. */
if ( inputs[73] == -9999 )
  LNN10Acts[73] = 0.58446308828603954;
else
  LNN10Acts[73] = inputs[73] * 0.02700825718749918 + -0.32593069622492238;

/* Input 74: standard numeric pre-processing: linear shift and scale. */
if ( inputs[74] == -9999 )
  LNN10Acts[74] = 0.99953407497269209;
else
  LNN10Acts[74] = inputs[74] * 4.0215213653644707e-012 + 0.99999997983728772;

/* Input 75: standard numeric pre-processing: linear shift and scale. */
if ( inputs[75] == -9999 )
  LNN10Acts[75] = 0.99952216963030049;
else
  LNN10Acts[75] = inputs[75] * 1.3552526324827639e-011 + 0.99999993188811354;

/* Input 76: standard numeric pre-processing: linear shift and scale. */
if ( inputs[76] == -9999 )
  LNN10Acts[76] = 0.43361026355261878;
else
  LNN10Acts[76] = inputs[76] * 0.55991848944171874 + -0.024739065258499938;

/* Input 77: standard numeric pre-processing: linear shift and scale. */
if ( inputs[77] == -9999 )
  LNN10Acts[77] = 0.99952216961981677;
else
  LNN10Acts[77] = inputs[77] * 1.3552526324499609e-011 + 0.99999993188871239;

/* Input 78: standard numeric pre-processing: linear shift and scale. */
if ( inputs[78] == -9999 )
  LNN10Acts[78] = 0.99951719624388247;
else
  LNN10Acts[78] = inputs[78] * 1.5488601399982112e-011 + 0.99999992215784461;

/* Input 79: standard numeric pre-processing: linear shift and scale. */
if ( inputs[79] == -9999 )
  LNN10Acts[79] = 0.6201201393428758;
else
  LNN10Acts[79] = inputs[79] * 0.11946062442068471 + -0.06752113593297801;

```



```

/* Input 80: standard numeric pre-processing: linear shift and scale. */
if ( inputs[80] == -9999 )
  LNN10Acts[80] = 0.99951719616354373;
else
  LNN10Acts[80] = inputs[80] * 1.5488601397973947e-011 + 0.99999992216659905;

/* Input 81: standard numeric pre-processing: linear shift and scale. */
if ( inputs[81] == -9999 )
  LNN10Acts[81] = 0.99950113416809949;
else
  LNN10Acts[81] = inputs[81] * 1.7487130461536732e-011 + 0.99999991211369621;

/* Input 82: standard numeric pre-processing: linear shift and scale. */
if ( inputs[82] == -9999 )
  LNN10Acts[82] = 0.57820299531018127;
else
  LNN10Acts[82] = inputs[82] * 0.07720488594589342 + -0.21019544898009124;

/* Input 83: standard numeric pre-processing: linear shift and scale. */
if ( inputs[83] == -9999 )
  LNN10Acts[83] = 0.99950113403724794;
else
  LNN10Acts[83] = inputs[83] * 1.7487130457575842e-011 + 0.99999991216130613;

/* Input 84: standard numeric pre-processing: linear shift and scale. */
if ( inputs[84] == -9999 )
  LNN10Acts[84] = 0.99956736460943663;
else
  LNN10Acts[84] = inputs[84] * 8.6736170822318986e-012 + 0.99999995640839145;

/* Input 85: standard numeric pre-processing: linear shift and scale. */
if ( inputs[85] == -9999 )
  LNN10Acts[85] = 0.38290819908127799;
else
  LNN10Acts[85] = inputs[85] * 0.03583326625415148 + -0.39343194405856047;

/* Input 86: standard numeric pre-processing: linear shift and scale. */
if ( inputs[86] == -9999 )
  LNN10Acts[86] = 0.99956736451679185;
else
  LNN10Acts[86] = inputs[86] * 8.6736170814313106e-012 + 0.99999995650362361;

/* Input 87: standard numeric pre-processing: linear shift and scale. */
if ( inputs[87] == -9999 )
  LNN10Acts[87] = 0.99953407846048881;
else
  LNN10Acts[87] = inputs[87] * 3.2172188225312508e-012 + 0.99999998383099675;

```

```

/* Input 88: standard numeric pre-processing: linear shift and scale. */
if ( inputs[88] == -9999 )
    LNN10Acts[88] = 0.58847468734428787;
else
    LNN10Acts[88] = inputs[88] * 0.024334929463708174 + -0.34826893743770176;

/* Input 89: standard numeric pre-processing: linear shift and scale. */
if ( inputs[89] == -9999 )
    LNN10Acts[89] = 0.99953407838273656;
else
    LNN10Acts[89] = inputs[89] * 3.2172188222025297e-012 + 0.99999998387703981;

/*
 * Process layer 1.
 */

/* For each unit in turn */
for ( u=0; u < 1; ++u )
{
    /*
     * First, calculate post-synaptic potentials, storing
     * these in the LNN10Acts array.
     */

    /* Initialise hidden unit activation to zero */
    LNN10Acts[90+u] = 0.0;

    /* Accumulate weighted sum from inputs */
    for ( i=0; i < 90; ++i )
        LNN10Acts[90+u] += *w++ * LNN10Acts[0+i];

    /* Subtract threshold */
    LNN10Acts[90+u] -= *t++;

}

/* Type of output required - selected by outputType parameter */
switch ( outputType )
{
    /* The usual type is to generate the output variables */
    case 0:

        /* Post-process output 0, two-state nominal output */
        if ( LNN10Acts[90] >= 0.12548828125 )
            outputs[0] = 2.0;

```

```

else
    outputs[0] = 1.0;
break;

/* type 1 is activation of output neurons */
case 1:
    for ( i=0; i < 1; ++i )
        outputs[i] = LNN10Acts[90+i];
    break;

/* type 2 is codebook vector of winning node (lowest actn) 1st hidden layer */
case 2:
    {
        int winner=0;
        for ( i=1; i < 1; ++i )
            if ( LNN10Acts[90+i] < LNN10Acts[90+winner] )
                winner=i;

        for ( i=0; i < 90; ++i )
            outputs[i] = LNN10Weights[90*winner+i];
    }
    break;

/* type 3 indicates winning node (lowest actn) in 1st hidden layer */
case 3:
    {
        int winner=0;
        for ( i=1; i < 1; ++i )
            if ( LNN10Acts[90+i] < LNN10Acts[90+winner] )
                winner=i;

        outputs[0] = winner;
    }
    break;
}
}

/*
Test harness. Compile including this main() procedure, as
a windows console program or a DOS program, to interactively
test that the software functions as expected.
*/

void main(void)
{
    int i, outputType=0, noOutputs=1;
    double inputs[90], outputs[90];

```

```
printf( "\n\nLNN test harness program. Enter inputs below\n" );
printf( "Nominal variables should be numbered starting at 1 (0 for missing)\n" );
printf( "(e.g. if an input is Gender={male,female}, enter 1 for male, 2 for female)\n" );
```

```
/* Infinite (user-breakable) loop for repeated tests */
start_of_loop:
while ( 1 )
{
/* Get the input pattern */
for ( i=0; i < 90; ++i )
{
printf( "Enter value for input %d: ", i+1 );
scanf( "%lg", & inputs[i] );

/* Check for sub-menu */
if ( inputs[i] == MENUCODE )
{
printf( "Control menu. Select output style, or exit:\n" );
printf( "0. Normal output style (output variable)\n" );
printf( "1. Output layer activations\n" );
printf( "2. Codebook vector (usual only for Kohonen networks\n" );
printf( "3. Winning hidden neuron (ditto only Kohonen)\n" );
printf( "4. Exit program\n" );
printf( "> " );
scanf( "%d", & outputType );
if ( outputType < 0 || outputType > 3 )
{
printf( "\nBye.\n" );
return;
}
}
else
{
/* Determine how many outputs there are to display (depends on
* output type)
*/
switch ( outputType )
{
case 0:
noOutputs = 1;
break;

case 1:
noOutputs = 1;
break;

case 2:
```

```

        noOutputs = 90;
        break;

    case 3:
        noOutputs = 1;
        break;
    }
    goto start_of_loop;
}
}
}

/* Run the neural network */
LNN10Run( inputs, outputs, outputType );

/* Display the output of the neural network */
printf( "\n\nOutput of neural network:\n" );

for ( i=0; i < noOutputs; ++i )
{
    printf( "Output %d: ", i+1 );
    printf( "%g\n", outputs[i] );
}

printf( "\nEnter next input pattern (for control menu inc. exit, enter %d for any input):\n",
MENUCODE );
}
}

```
